# Supplementary material for: Maintaining a Cognitive Map in Darkness: The Need to Fuse Boundary Knowledge with Path Integration
Source: PubMed Central journal article supplement (PMC3420935; doi:10.1371/journal.pcbi.1002651), 2012-08-16

**A**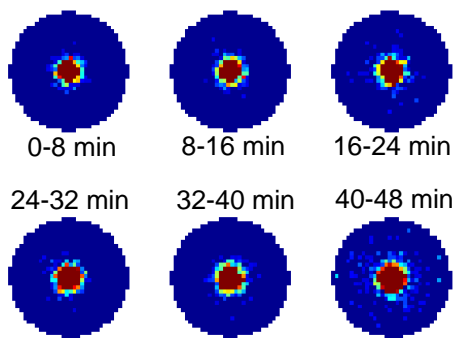**B**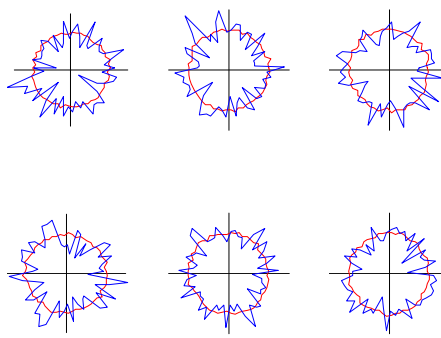**C**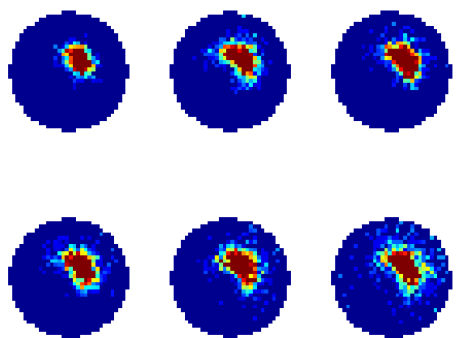**D**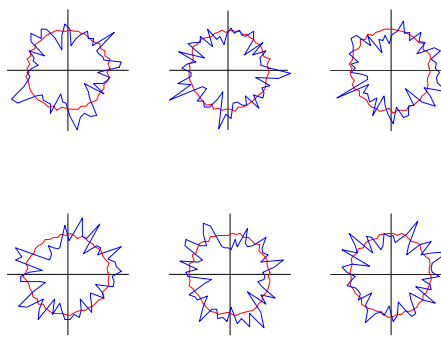**E**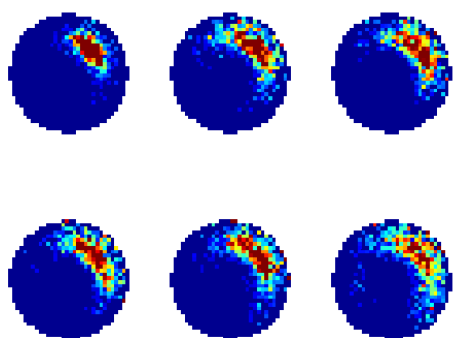**F**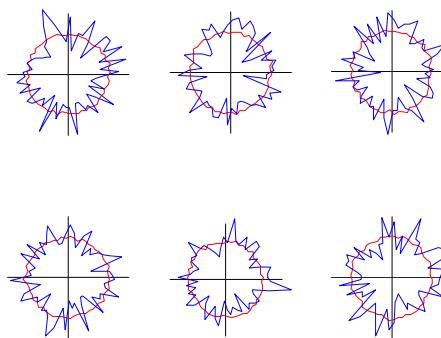**G**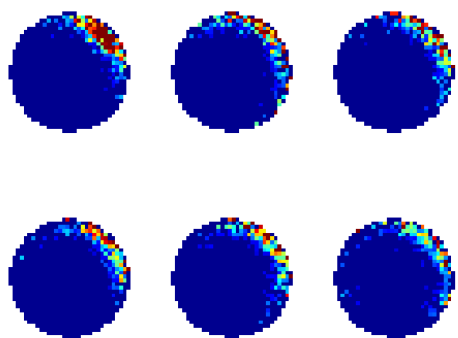**H**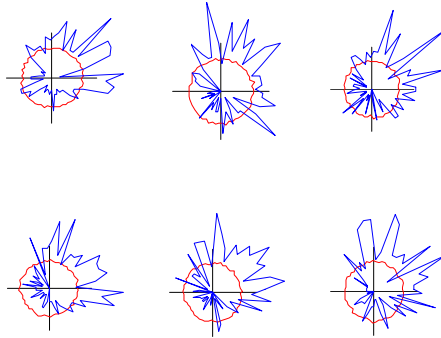

Supplement: pcbi.1002651.s004.pdf [file pcbi.1002651.s004.pdf]
