# Supplementary material for: Maintaining a Cognitive Map in Darkness: The Need to Fuse Boundary Knowledge with Path Integration
Source: PubMed Central journal article supplement (PMC3420935; doi:10.1371/journal.pcbi.1002651), 2012-08-16
Supplement: pcbi.1002651.s010.pdf [file pcbi.1002651.s010.pdf]

Table S1 – Mean squared distance errors in circular and square arenas, assuming location at the boundary.

| W+       | $\langle D_0^2   x, y \rangle$ | $\langle D_p^2   x, y \rangle$ |
|----------|--------------------------------|--------------------------------|
| Circular | $3r^2/2$                       | $2r^2$                         |
| Square   | $x^2 + y^2 + w^2/6$            | $x^2 + y^2 + w^2/3$            |
