# Supplementary material for: Maintaining a Cognitive Map in Darkness: The Need to Fuse Boundary Knowledge with Path Integration
Source: PubMed Central journal article supplement (PMC3420935; doi:10.1371/journal.pcbi.1002651), 2012-08-16
Supplement: pcbi.1002651.s011.pdf [file pcbi.1002651.s011.pdf]

Table S2 – Mean place stability index in circular and square arenas.

| Arena Shape | Average Place Stability Index |                             |
|-------------|-------------------------------|-----------------------------|
|             | $\langle I_p   W + \rangle$   | $\langle I_p   W - \rangle$ |
| Circular    | 0.4286                        | 0.5000                      |
| Square      | 0.4275                        | 0.5000                      |
