# Supplementary material for: Maintaining a Cognitive Map in Darkness: The Need to Fuse Boundary Knowledge with Path Integration
Source: PubMed Central journal article supplement (PMC3420935; doi:10.1371/journal.pcbi.1002651), 2012-08-16
Supplement: pcbi.1002651.s012.pdf [file pcbi.1002651.s012.pdf]

Table S3 - Properties of simulated place fields in a circular arena.

| Cartesian mean of particle cloud position estimate |                 |          |          |          |          |          |          |
|----------------------------------------------------|-----------------|----------|----------|----------|----------|----------|----------|
| Property                                           | Radial position | Time     |          |          |          |          |          |
|                                                    |                 | 0-8min   | 8-16min  | 16-24min | 24-32min | 32-40min | 40-48min |
| Spatial information (bits/spike)                   | 0cm             | 3.674556 | 3.571258 | 3.457551 | 3.392681 | 3.412098 | 3.00895  |
|                                                    | 10cm            | 3.261239 | 2.542717 | 2.621484 | 2.569233 | 2.412031 | 2.020061 |
|                                                    | 20cm            | 2.831038 | 2.057825 | 2.140235 | 2.19268  | 2.077288 | 1.795725 |
|                                                    | 30cm            | 3.335579 | 3.250581 | 3.273341 | 3.233897 | 3.132384 | 3.128845 |
| Directional information (bits/spike)               | 0cm             | 0.041847 | 0.038666 | 0.028708 | 0.043126 | 0.023611 | 0.026777 |
|                                                    | 10cm            | 0.034485 | 0.032113 | 0.03738  | 0.040986 | 0.037506 | 0.02968  |
|                                                    | 20cm            | 0.052981 | 0.051687 | 0.062239 | 0.04443  | 0.038883 | 0.055162 |
|                                                    | 30cm            | 0.094518 | 0.240577 | 0.22094  | 0.154769 | 0.319183 | 0.280091 |
| Spikes                                             | 0cm             | 919      | 1076     | 1103     | 1080     | 1209     | 1519     |
|                                                    | 10cm            | 890      | 1079     | 1091     | 1128     | 1174     | 1287     |
|                                                    | 20cm            | 804      | 932      | 942      | 929      | 952      | 965      |
|                                                    | 30cm            | 432      | 278      | 267      | 251      | 266      | 222      |
| R                                                  | 0cm             | 1        | 0.975686 | 0.971722 | 0.971464 | 0.973408 | 0.958472 |
|                                                    | 10cm            | 1        | 0.916391 | 0.885312 | 0.918935 | 0.901989 | 0.850538 |
|                                                    | 20cm            | 1        | 0.740511 | 0.70648  | 0.719948 | 0.632756 | 0.524941 |
|                                                    | 30cm            | 1        | 0.374191 | 0.462857 | 0.519611 | 0.632453 | 0.388953 |
| R <sub>max</sub>                                   | 0cm             | 1        | 0.976796 | 0.977083 | 0.971414 | 0.976373 | 0.963041 |
|                                                    | 10cm            | 1        | 0.904085 | 0.884353 | 0.903194 | 0.900841 | 0.852474 |
|                                                    | 20cm            | 1        | 0.782565 | 0.760137 | 0.786553 | 0.751757 | 0.683094 |
|                                                    | 30cm            | 1        | 0.626135 | 0.707608 | 0.695021 | 0.692706 | 0.662639 |
| $\Delta\theta_{\max}$ (°)                          | 0cm             | N/A*     |          |          |          |          |          |
|                                                    | 10cm            | 0        | -1       | 0        | 1        | -3       | 7        |
|                                                    | 20cm            | 0        | 1        | 0        | 3        | 7        | -5       |
|                                                    | 30cm            | 0        | 12       | 8        | 11       | 4        | 0        |
| Coherence                                          | 0cm             | 0.967767 | 0.975292 | 0.973894 | 0.97648  | 0.980025 | 0.976664 |
|                                                    | 10cm            | 0.963402 | 0.965041 | 0.959354 | 0.956044 | 0.957557 | 0.942884 |
|                                                    | 20cm            | 0.936281 | 0.901708 | 0.879076 | 0.880516 | 0.864356 | 0.846038 |
|                                                    | 30cm            | 0.910753 | 0.566805 | 0.734283 | 0.785527 | 0.764981 | 0.720978 |

| Polar mean of particle cloud position estimate |                 |          |          |          |          |          |          |
|------------------------------------------------|-----------------|----------|----------|----------|----------|----------|----------|
| Property                                       | Radial position | Time     |          |          |          |          |          |
|                                                |                 | 0-8min   | 8-16min  | 16-24min | 24-32min | 32-40min | 40-48min |
| Spatial information (bits/spike)               | 0cm             | 4.024516 | 4.050488 | 4.077583 | 4.029865 | 4.048992 | 4.152669 |
|                                                | 10cm            | 3.561757 | 3.300398 | 3.249514 | 3.235175 | 3.179041 | 3.074484 |
|                                                | 20cm            | 3.156433 | 2.549257 | 2.540526 | 2.60719  | 2.56009  | 2.409524 |
|                                                | 30cm            | 3.128432 | 2.621022 | 2.747887 | 2.702138 | 2.654352 | 2.471658 |
| Directional information (bits/spike)           | 0cm             | 0.07565  | 0.132734 | 0.135035 | 0.125847 | 0.097344 | 0.134659 |
|                                                | 10cm            | 0.036655 | 0.075184 | 0.042936 | 0.057134 | 0.066016 | 0.046773 |
|                                                | 20cm            | 0.052016 | 0.072719 | 0.056188 | 0.066963 | 0.071467 | 0.062376 |
|                                                | 30cm            | 0.097991 | 0.104033 | 0.094762 | 0.068934 | 0.106029 | 0.081208 |
| Spikes                                         | 0cm             | 381      | 377      | 352      | 354      | 347      | 398      |
|                                                | 10cm            | 785      | 746      | 737      | 706      | 693      | 675      |
|                                                | 20cm            | 671      | 657      | 672      | 697      | 685      | 663      |
|                                                | 30cm            | 497      | 517      | 531      | 542      | 521      | 545      |
| R                                              | 0cm             | 1        | 0.941309 | 0.930032 | 0.928566 | 0.951451 | 0.940139 |
|                                                | 10cm            | 1        | 0.949512 | 0.934494 | 0.937344 | 0.907602 | 0.903212 |
|                                                | 20cm            | 1        | 0.881351 | 0.841289 | 0.847701 | 0.818375 | 0.802163 |
|                                                | 30cm            | 1        | 0.617117 | 0.667643 | 0.700137 | 0.735508 | 0.656524 |
| R <sub>max</sub>                               | 0cm             | 1        | 0.960307 | 0.938963 | 0.958638 | 0.965476 | 0.959362 |
|                                                | 10cm            | 1        | 0.94806  | 0.93989  | 0.942501 | 0.912716 | 0.906243 |
|                                                | 20cm            | 1        | 0.88132  | 0.857692 | 0.858118 | 0.847544 | 0.826228 |
|                                                | 30cm            | 1        | 0.764436 | 0.806756 | 0.821722 | 0.81904  | 0.726003 |
| $\Delta\theta_{\max}$ (°)                      | 0cm             | N/A      |          |          |          |          |          |
|                                                | 10cm            | 0        | -1       | -4       | 1        | -5       | -7       |
|                                                | 20cm            | 0        | 1        | 12       | 2        | 7        | 11       |
|                                                | 30cm            | 0        | -11      | 3        | 1        | 0        | -3       |
| Coherence                                      | 0cm             | 0.935026 | 0.947315 | 0.954564 | 0.924772 | 0.94369  | 0.960068 |
|                                                | 10cm            | 0.962573 | 0.95921  | 0.965403 | 0.959459 | 0.962309 | 0.954075 |
|                                                | 20cm            | 0.939109 | 0.925364 | 0.917684 | 0.924331 | 0.890945 | 0.912106 |
|                                                | 30cm            | 0.915909 | 0.701413 | 0.858829 | 0.847617 | 0.792117 | 0.80776  |

\*Fields at the center of the arena are approximately radially symmetric so estimates of angular drift have no clear meaning and are due largely to random variations in spike counts.
