# Supplementary material for: Maintaining a Cognitive Map in Darkness: The Need to Fuse Boundary Knowledge with Path Integration
Source: PubMed Central journal article supplement (PMC3420935; doi:10.1371/journal.pcbi.1002651), 2012-08-16
Supplement: pcbi.1002651.s013.pdf [file pcbi.1002651.s013.pdf]

Table S4 – Properties of simulated place field using allothetic path integration only.

| Property                 | Time   |         |          |          |          |          |
|--------------------------|--------|---------|----------|----------|----------|----------|
|                          | 0-8min | 8-16min | 16-24min | 24-32min | 32-40min | 40-48min |
| Spatial information*     | 1.6645 | 1.4777  | 1.3667   | 1.4894   | 1.5099   | 1.6002   |
| Directional information* | 0.1032 | 0.0960  | 0.0968   | 0.1152   | 0.1142   | 0.1548   |
| Spikes                   | 502    | 505     | 461      | 429      | 386      | 340      |
| R                        | 1.0000 | 0.4277  | 0.1912   | 0.2397   | 0.0769   | 0.0183   |

\*bits/spike
