# Supplementary material for: Maintaining a Cognitive Map in Darkness: The Need to Fuse Boundary Knowledge with Path Integration
Source: PLOS journal article supplement (doi:10.1371/journal.pcbi.1002651), 2012-08-16
Supplement: S18 (10.1371/journal.pcbi.1002651.s018) [file journal.pcbi.1002651.s018]

301 Moved Permanently

# Moved Permanently

The document has moved here.

---

Apache Server at www.ploscompbiol.org Port 80
